# Supplementary material for: Gender-specific analysis for the association between trunk muscle mass and spinal pathologies
Source: PubMed Central journal article supplement (PMC8035169; doi:10.1038/s41598-021-87334-4), 2021-04-09
Supplement: 41598_2021_87334_MOESM1_ESM.pdf [file 41598_2021_87334_MOESM1_ESM.pdf]

# Gender-specific analysis for the association between trunk muscle mass and spinal pathologies

Yusuke Hori, MD<sup>1</sup>; Masatoshi Hoshino, MD, PhD<sup>1\*</sup>; Kazuhide Inage, MD, PhD<sup>2</sup>; Masayuki Miyagi, MD, PhD<sup>3</sup>; Shinji Takahashi, MD, PhD<sup>1</sup>; Shoichiro Ohyama, MD, PhD<sup>1</sup>; Akinobu Suzuki, MD, PhD<sup>1</sup>; Tadao Tsujio, MD, PhD<sup>4</sup>; Hidetomi Terai, MD, PhD<sup>1</sup>; Sho Dohzono, MD, PhD<sup>5</sup>; Ryuichi Sasaoka, MD, PhD<sup>5</sup>; Hiromitsu Toyoda, MD, PhD<sup>1</sup>; Minori Kato, MD, PhD<sup>6</sup>; Akira Matsumura, MD, PhD<sup>6</sup>; Takashi Namikawa, MD, PhD<sup>6</sup>; Masahiko Seki, MD, PhD<sup>4</sup>; Kentaro Yamada, MD, PhD<sup>1</sup>; Hasibullah Habibi, MD<sup>1</sup>; Hamidullah Salimi, MD<sup>1</sup>; Masaomi Yamashita, MD, PhD<sup>7</sup>; Tomonori Yamauchi, MD, PhD<sup>8</sup>; Takeo Furuya, MD, PhD<sup>2</sup>; Sumihisa Orita, MD, PhD<sup>2, 10</sup>; Satoshi Maki, MD, PhD<sup>2</sup>; Yasuhiro Shiga, MD, PhD<sup>2</sup>; Masahiro Inoue, MD, PhD<sup>2</sup>; Gen Inoue, MD, PhD<sup>3</sup>; Hisako Fujimaki, MD, PhD<sup>3</sup>; Kosuke Murata, MD<sup>3</sup>; Ayumu Kawakubo, MD<sup>3</sup>; Daijiro Kabata, MPH<sup>9</sup>; Ayumi Shintani, PhD, MPH<sup>9</sup>; Seiji Ohtori, MD, PhD<sup>2</sup>; Masashi Takaso, MD, PhD<sup>3</sup>; and Hiroaki Nakamura MD, PhD<sup>1</sup>

<sup>1</sup>Department of Orthopaedic Surgery, Osaka City University Graduate School of Medicine, Osaka, Japan

<sup>2</sup>Department of Orthopaedic Surgery, Graduate school of Medicine, Chiba University, Chiba, Japan

<sup>3</sup>Department of Orthopaedic Surgery, Kitasato University, School of Medicine, Kanagawa, Japan

<sup>4</sup>Department of Orthopaedic Surgery, Shiraniwa Hospital, Nara, Japan

<sup>5</sup>Department of Orthopaedic Surgery, Yodogawa Christian Hospital, Osaka, Japan

<sup>6</sup>Department of Orthopaedic Surgery, Osaka City General Hospital, Osaka, Japan

<sup>7</sup>Department of Orthopedic Surgery, JCHO Funabashi Central Hospital, Chiba, Japan

<sup>8</sup>Department of Orthopedic Surgery, Asahi General Hospital, Chiba, Japan

<sup>9</sup>Department of Medical Statistics, Osaka City University Graduate School of Medicine, Osaka, Japan

<sup>10</sup>Chiba University Center for Frontier Medical Engineering, Chiba, Japan

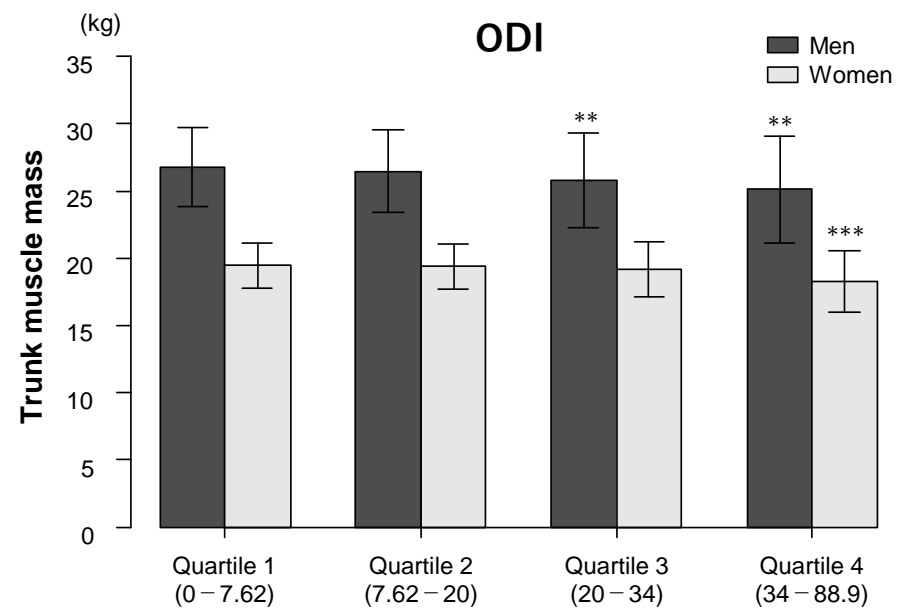

### Supplementary Figure S1

Comparison of trunk muscle mass across quartiles of the Oswestry Disability Index (ODI) adjusted for age and body mass index.

\* $p < 0.05$ ; \*\* $p < 0.01$ ; \*\*\* $p < 0.001$  compared with quartile 1.

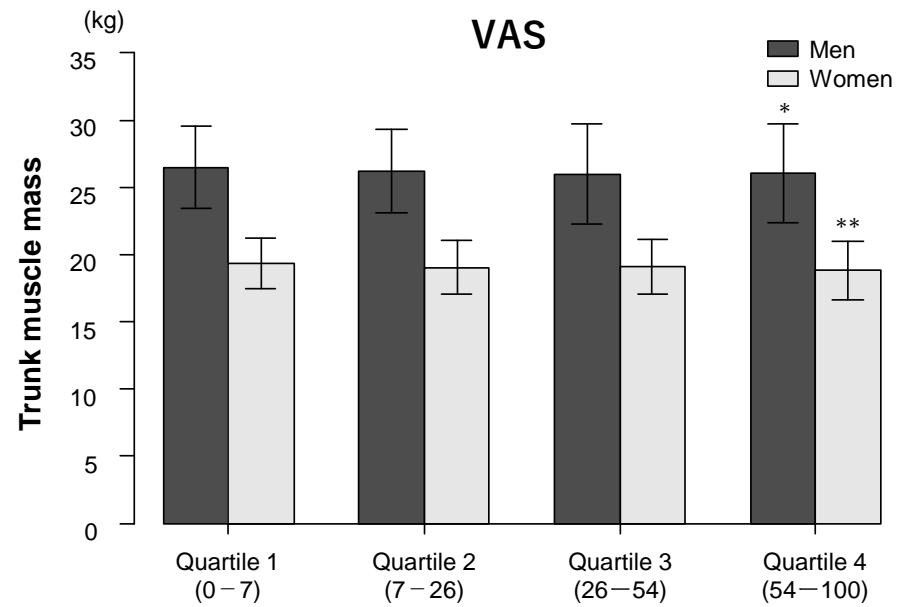

### Supplementary Figure S2

Comparison of trunk muscle mass across quartiles of visual analog scale (VAS) score for low back pain adjusted for age and body mass index.

\* $p < 0.05$ ; \*\* $p < 0.01$ ; \*\*\* $p < 0.001$  compared with quartile 1.

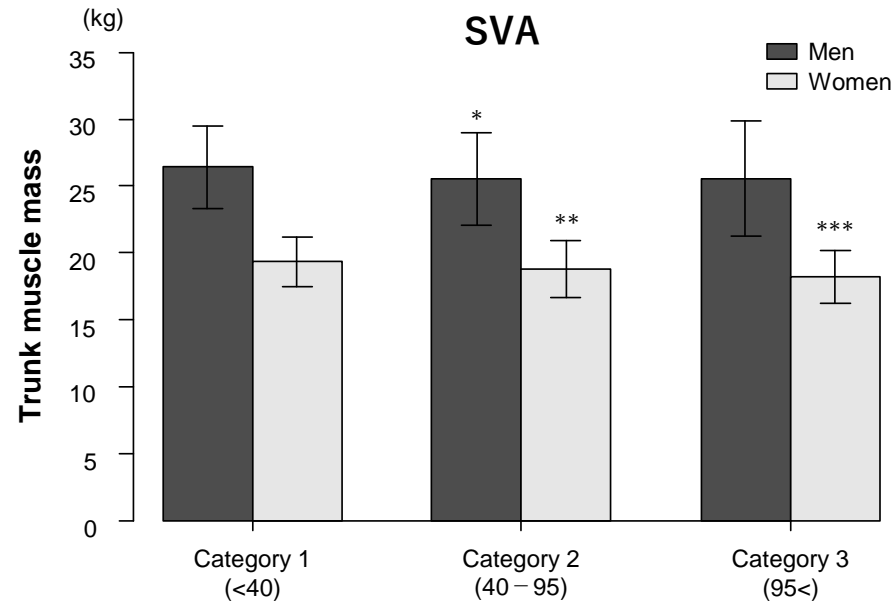

**Supplementary Figure S3**

Comparison of trunk muscle mass across categories of sagittal vertical axis (SVA) adjusted for age and body mass index.

\*p < 0.05; \*\*p < 0.01; \*\*\*p < 0.001 compared with category 1.

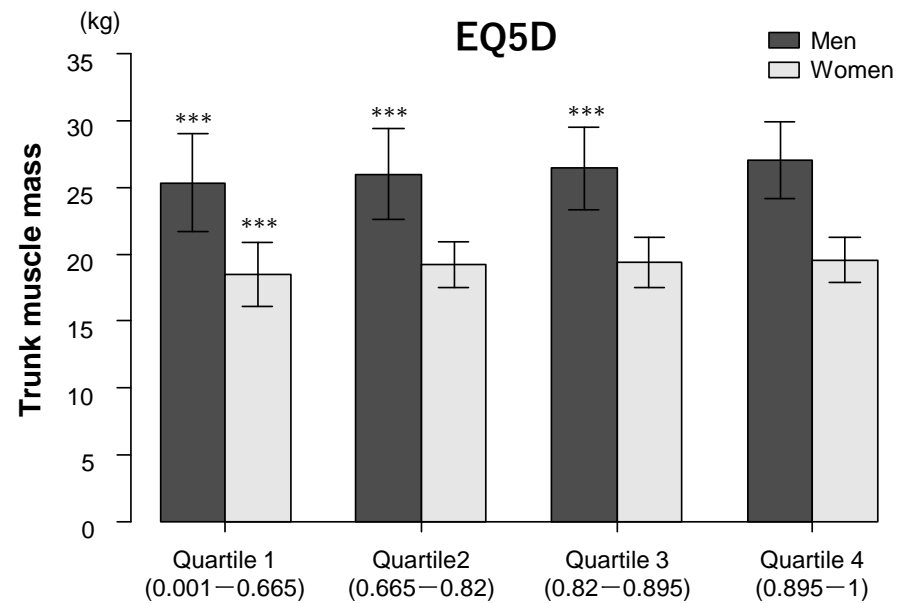

**Supplementary Figure S4**

Comparison of trunk muscle mass across quartiles of EuroQoL 5 dimension (EQ5D) adjusted for age and body mass index.

\*p < 0.05; \*\*p < 0.01; \*\*\*p < 0.001 compared with quartile 4.
